# Supplementary material for: Development and evaluation of pollen source methodologies for the Victorian Grass Pollen Emissions Module VGPEM1.0
Source: Copernicus journal article supplement (doi:10.5194/gmd-2019-43), 2019-02-15
Supplement: Supplementary file 1 [file gmd-2019-43-supplement.pdf]

# Development and evaluation of pollen source methodologies for the Victorian Grass Pollen Emissions Module VGPEM1.0

Kathryn M. Emmerson<sup>1</sup>, Jeremy D. Silver<sup>2</sup>, Edward, Newbiggin<sup>3</sup>, Edwin R. Lampugnani<sup>3</sup>, Cenk Suphioglu<sup>4</sup>, Alan Wain<sup>5</sup> and Elizabeth Ebert<sup>5</sup>

5 <sup>1</sup>Climate Science Centre, CSIRO Oceans & Atmosphere, Aspendale, VIC 3195. Australia

<sup>2</sup>School of Earth Sciences, University of Melbourne, VIC 3010 Australia.

<sup>3</sup>School of BioSciences, University of Melbourne, VIC 3010, Australia

<sup>4</sup>School of Life and Environmental Sciences, Deakin University, Waurn Ponds, VIC 3216, Australia.

<sup>5</sup>Bureau of Meteorology, Docklands, VIC 3008, Australia.

10 *Correspondence to:* Kathryn M. Emmerson (kathryn.emmerson@csiro.au)

## 1. Shifted Gaussian distributions based on observed patterns

Figure S 1 shows the observed pollen time series over the 2017 season at each of the count sites. We have fitted a normal distribution to these data, minimising the root mean squared error between the fit and the observations. The mean ( $\mu$ ), standard distribution (sd) and fitting parameter (SF) of each individual fit are given in the top left of each panel.

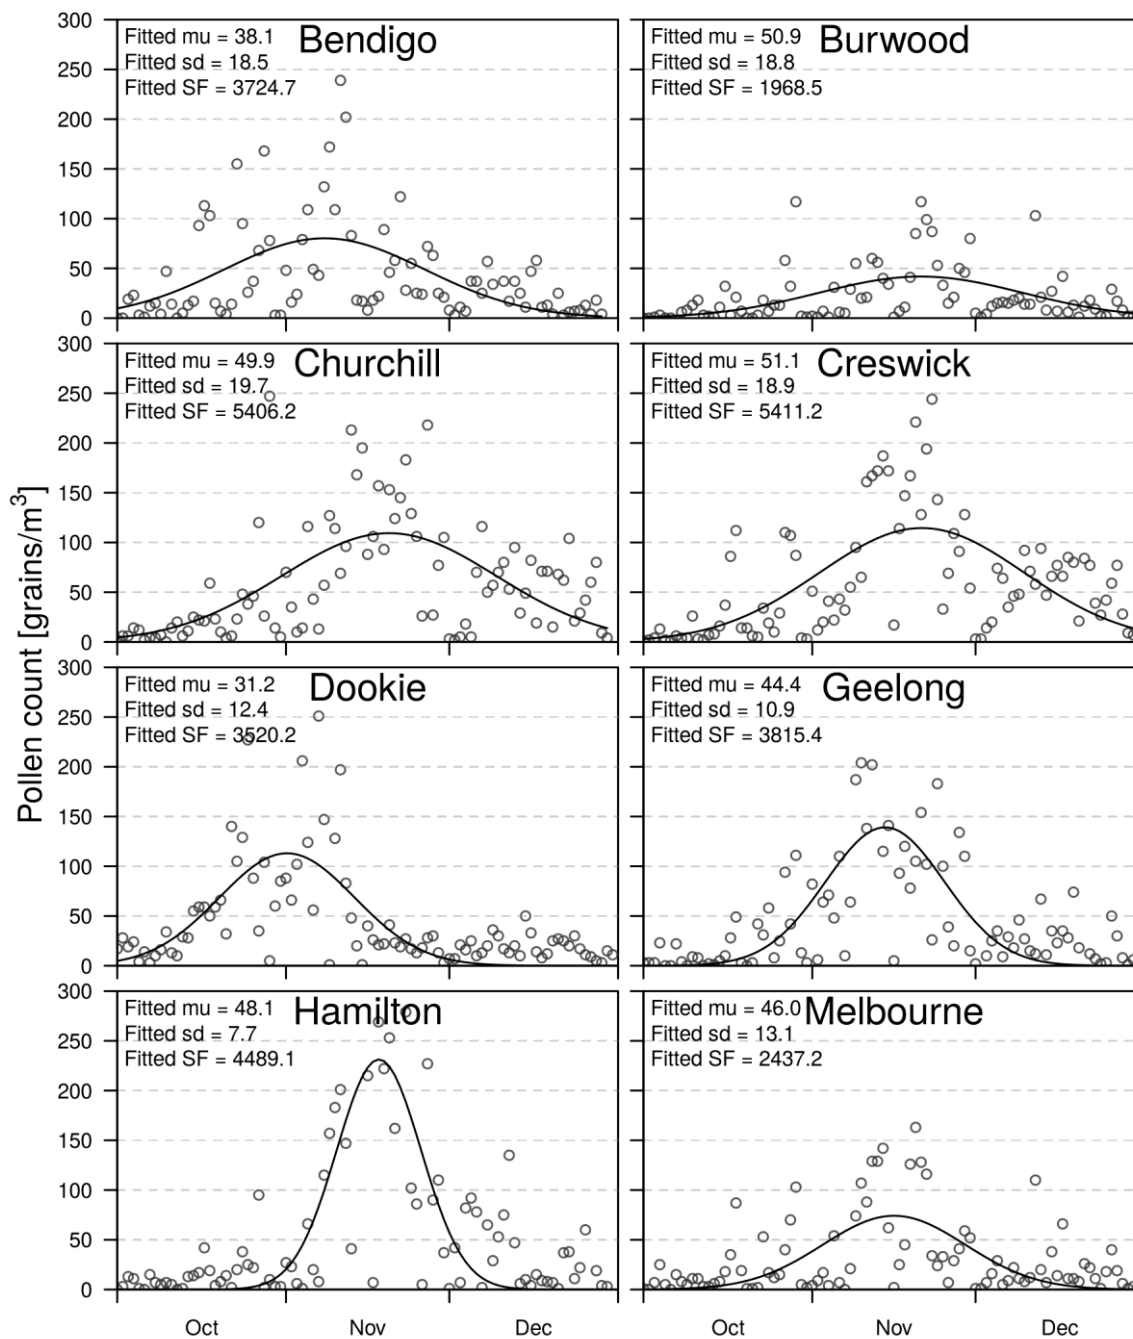

**Figure S 1** Time series of observed pollen at each site, which has had a normal distribution fitted to these data.

## 2. Index of Agreement

The Index of Agreement (IOA) (Willmott et al. 2012) has been calculated using the ModStats package within Openair (Carslaw and Ropkins, 2012). The description of IOA has been taken from the Openair manual (Carslaw, 2015).

IOA spans between  $-1$  and  $+1$  with values approaching  $+1$  representing better model performance. An IOA of  $0.5$ , for example, indicates that the sum of the error magnitudes is one half of the sum of the observed-deviation magnitudes. When IOA =  $0.0$ , it signifies that the sum of the magnitudes of the errors and the sum of the observed-deviation magnitudes are equivalent. When IOA =  $-0.5$ , it indicates that the sum of the error-magnitudes is twice the sum of the perfect model-deviation and observed-deviation magnitudes. Values of IOA near  $-1.0$  can mean that the model estimated deviations about O are poor estimates of the observed deviations; but, they also can mean that there simply is little observed variability — so some caution is needed when the IOA approaches  $-1$ . It is defined as (with  $c = 2$ ):

$$IOA = \begin{cases} 1.0 - \frac{\sum_{i=1}^n |M_i - O_i|}{c \sum_{i=1}^n |O_i - \bar{O}|}, & \text{when} \\ \sum_{i=1}^n |M_i - O_i| \leq c \sum_{i=1}^n |O_i - \bar{O}| \\ \frac{c \sum_{i=1}^n |O_i - \bar{O}|}{\sum_{i=1}^n |M_i - O_i|} - 1.0, & \text{when} \\ \sum_{i=1}^n |M_i - O_i| > c \sum_{i=1}^n |O_i - \bar{O}| \end{cases}$$

## 3. Gerrity score

For a multi-category forecast we may wish to reward correct forecasts of rare events more than correct forecasts of common events, and penalise forecasts that are badly wrong more than forecasts that are only a little bit wrong. A class of scores called "Gerrity scores" (GS) do just this by multiplying the contingency table by a scoring matrix (which is really a set of weights) and summing to get a score. That is,

|   |  | Observed |          |          | Scoring matrix |          |          |
|---|--|----------|----------|----------|----------------|----------|----------|
|   |  | L        | M        | H+       |                |          |          |
| L |  | $n_{11}$ | $n_{12}$ | $n_{13}$ | $s_{11}$       | $s_{12}$ | $s_{13}$ |

|          |       |          |          |          |
|----------|-------|----------|----------|----------|
| Forecast | M     | $n_{21}$ | $n_{22}$ | $n_{23}$ |
|          | H+    | $n_{31}$ | $n_{32}$ | $n_{33}$ |
|          | total | $n_1$    | $n_2$    | $n_3$    |

 $\times$ 

|          |          |          |
|----------|----------|----------|
| $s_{21}$ | $s_{22}$ | $s_{23}$ |
| $s_{31}$ | $s_{32}$ | $s_{33}$ |

$$GS = \frac{1}{N} \sum_{i=1}^3 \sum_{j=1}^3 n_{ij} s_{ij}$$

GS measures the skill, relative to random chance, of predicting the correct category and ranges from -1 to 1 (perfect). It can be used with multi-category forecasts of any dimension, but is probably most often applied to 3-category forecasts.

The scoring matrix is computed from the climatology (base rate) of the observations, i.e. how often each category occurs, and has nothing to do with the forecasts. You can either use the long-term climatology or the sample climatology. The long-term climatology is better if you have it but it is often the case that you have to estimate it from the sample.

Here are the steps for computing the elements of the scoring matrix:

1. If using the sample climatology, compute the observed relative probability of each category  $i=1, 2, 3$  as  $p_i = n_i / N$  where  $n_i$  is the total number observed in each category and  $N$  is the total number of samples.

2. Compute intermediate variables  $a_i$  from the relative probabilities,

$$a_1 = (1 - p_1) / p_1 \quad a_2 = (1 - p_1 - p_2) / (p_1 + p_2) \quad a_3 = (1 - p_1 - p_2 - p_3) / (p_1 + p_2 + p_3)$$

3. Compute diagonal elements of the scoring matrix as

$$s_{11} = 0.5 * (a_1 + a_2)$$

$$s_{22} = 0.5 * \left( \frac{1}{a_1} + a_2 \right)$$

$$s_{33} = 0.5 * \left( \frac{1}{a_1} + \frac{1}{a_2} \right)$$

4. Compute off-diagonal elements of the scoring matrix as

$$s_{12} = s_{21} = 0.5 * (a_2 - 1)$$

$$s_{13} = s_{31} = -1$$

$$s_{23} = s_{32} = 0.5 * \left( \frac{1}{a_1} - 1 \right)$$

|        |        |        |
|--------|--------|--------|
| 0.24   | - 0.45 | - 1.00 |
| - 0.45 | 1.38   | 0.83   |
| - 1.00 | 0.83   | 6.00   |

For the Melbourne pollen forecasts, the scoring matrix is  $S =$

When multiplied by the 3-category contingency table on the first page we get a Gerrity score for the 1-day forecasts of GS=0.468. It is greater than zero and therefore is a skilful value!

- 5 More information about verification scores is available online at [www.cawcr.gov.au/projects/verification](http://www.cawcr.gov.au/projects/verification).

#### 4. References

Carslaw, D.C. and K. Ropkins, (2012). openair — an R package for air quality data analysis. Environmental Modelling & Software. Volume 27-28, pp. 52–61.

Carslaw, D.C. (2015). The openair manual — open-source tools for analysing air pollution data. Manual for version 1.1-4,

- 10 King's College London.

Willmott, C. J., Robeson, S. M. and Matsuura, K. (2012), A refined index of model performance. Int. J. Climatol., 32: 2088-2094. doi:10.1002/joc.2419.

#### 5. Pollen emissions code VGPEM1.0

- 15 SUBROUTINE CTM\_pollen\_emissions (nx, ny, nz, zfull, dxy, wspd, U10m, V10m, sfctemp, sfcpres, mix\_ratio, prcpR,  
prcpU, tscr\_24h, SH\_24h, CTM\_clock\_current\_LST, geoGrid, zenith, pollen\_veg, evi\_gradient, last\_available,  
EVIfallDaySmoothed, EVIwinterMaxSmoothed, Srate, PollenFluxes)

IMPLICIT NONE

- 20 INTEGER, INTENT(IN) :: nx !east/west points  
INTEGER, INTENT(IN) :: ny !north/south points  
INTEGER, INTENT(IN) :: nz !vertical points  
REAL, INTENT(IN), DIMENSION(nx,ny,nz) :: zfull !unscaled cell heights (m)  
REAL, INTENT(IN), DIMENSION(nx,ny) :: dxy !cell areas (m2) - unscaled  
25 REAL, INTENT(IN), DIMENSION(nx,ny) :: wspd !wind speed (m/s)  
REAL, INTENT(IN), DIMENSION(nx,ny) :: U10m !U wind speed (m/s)  
REAL, INTENT(IN), DIMENSION(nx,ny) :: V10m !V wind speed (m/s)  
REAL, INTENT(IN), DIMENSION(nx,ny) :: sfctemp !surface temp (K)  
REAL, INTENT(IN), DIMENSION(nx,ny) :: sfcpres !surface pres (Pa)  
30 REAL, INTENT(IN), DIMENSION(nx,ny,nz) :: mix\_ratio !mixing ratio (g/g)

```

REAL, INTENT(IN), DIMENSION(nx,ny) :: prcpR !resolved precipitation (m/s)
REAL, INTENT(IN), DIMENSION(nx,ny) :: prcpU !convective precipitation (m/s)

TYPE(clock_variable) :: CTM_clock_current_LST !CTM current time in local solar time
5 TYPE(geo), INTENT(IN), DIMENSION(nx,ny) :: geoGrid !lat/long of all grid points
REAL, INTENT(IN), DIMENSION(nx,ny) :: zenith !zenith angle by grid point
REAL, INTENT(IN), DIMENSION(nx,ny) :: pollen_veg !veg for pollen
REAL, INTENT(IN), DIMENSION(nx,ny) :: evi_gradient ! Gradient of the EVI
REAL, INTENT(INOUT), DIMENSION(nx,ny) :: last_available ! last available pollen on plants
10 REAL, INTENT(IN), DIMENSION(nx,ny,1) :: EVIfallDaySmoothed
REAL, INTENT(IN), DIMENSION(nx,ny,1) :: EVIwinterMaxSmoothed

REAL, INTENT(INOUT) :: Srate(nx*ny,number_species) !Emsn rate array!cumulative emission rates (g/m3/s)
TYPE(PollenFlux), INTENT(INOUT),DIMENSION(nx*ny,number_pollen_sizes) :: PollenFluxes !pollen flux in g/m3/s
15

! local definitions
INTEGER :: i,j,k,oneD,kday
REAL, DIMENSION(nx,ny) :: Pfx !holding area
REAL :: pollen_EF ! emission factor for pollen based on jday
20 REAL :: relhum ! relative humidity (0-1, just calculated again)
REAL :: relhum_24h ! 24h relative humidity
real :: local_e
real :: local_solar_time ! the local solar time 0.0 to 23.99
real :: logit_y1 = 0.05, logit_y2 = 0.95 ! ordinates for the *_x1 and *_x2 values
25 real :: prc_x1, prc_x2 ! abscissae where logistic function reaches logit_y1, logit_y2 for precip
real :: prc_alpha, prc_c ! logistic function parameters for precip
real :: prc_logit0 ! ordinate of precip logistic function at prc=0
real :: rh_x1, rh_x2 ! abscissae where logistic function reaches logit_y1, logit_y2 for rel hum
real :: rh_alpha, rh_c ! logistic function parameters for rel hum
30 real :: loc_solar_mu ! timing of the mean daily pollen release (in fractional hours)
real :: loc_solar_sigma1 ! standard deviation around the mean daily pollen release (in fractional hours)
real :: loc_solar_sigma2
real :: precip_sum_target ! rainfall amount [cm] required to achieve the maximum capacity in terms of pollen emissions
real :: doy_mu ! mean day-of-year (in fractional days) of the pollen emissions peak

```

```

real :: doy_sigma ! standard deviation (in fractional days) around the emissions peak
real :: soy_mu    ! mean second-of-year (in seconds) of the pollen emissions peak
real :: soy_sigma ! standard deviation (in seconds) around the emissions peak
real :: immediate_timing ! scaling factor for the immediate emissions (between 0 and 1). Essentially the fraction to release.
5  real :: gross_timing ! scaling factor for the emissions based on phenology, this varies slowly with time. It take values between
0 and 1. Essentially the fraction to release.
real :: spatial ! the spatial scaling factor
real :: rh_factor
real :: prc_factor
10 real :: f_wind
real :: hour_factor1, hour_factor2
real :: t2_factor
real :: prc
real :: loss_factor    ! fraction of pollen available lost from plant to wet and dry deposition [0, 1]
15 real :: available    ! available pollen mass to release
real :: prod          ! amount of pollen produced per timestep
real :: loss          ! amount of pollen lost per timestep
real :: released      ! amount of pollen emitted per timestep
real :: rhour         ! the model time in UTC [fractional hour, i.e. 0 to 23.999]
20 real :: capacity_limit ! maximum theoretical production [g/m2]
! parameters
real, parameter :: sqrt_two_pi = 2.506628274631 ! sqrt(2*pi)
real, parameter :: KtoC = 273.15    ! 0 degrees C in degrees Kelvin
real, parameter :: f_stagnant = 0.33 ! suppression factor in stagnant conditions
25 real, parameter :: f_promote = 0.67 ! promotion factor under windy conditions
real, parameter :: usatur    = 5.0 ! saturation wind speed [m/s]
real, parameter :: tsatur    = 15.0 ! saturation temperature
real, parameter :: T_mid     = 15.0 ! midpoint of temperature factor [C]
real, parameter :: T_rate    = 0.33 ! rate of change in temperature factor at midpoint [1/C], before scaling factor is applied
30 ! maximum theoretical production
real :: max_capacity ! [g/m2]
logical :: first
real, parameter :: dtstep = 3600.0 ! seconds since last function call (1 hour)

```

```

real :: yday ! day of year
real, DIMENSION(nx,ny) :: prcpThisDay, prcpPreviousDay ! current & previous days precipitation in units of millimeters
! local variables
real :: a0
5 real :: b0
real :: mu
real :: ydayTest(3)
integer :: iMinYdayTest
real :: ydayToUse
10 real, parameter :: sigma = 19.

! 1 kg / hectare = 1000 g / (10000 m^2) = 1 g / (10 m^2) = 0.1 g m^{-2}
! 464 kg/hectare = maximum theoretical pollen emission for perennial rye-grass (Smart, Tuddenham, Knox; 1979 ; Aust. J.
15 Bot. ; V27, pp. 333-342)
max_capacity = 46.4 ! [g/m2]

! Need to convert LST hour into a local time (+10 for Victoria).
time_zone=150./15.
20 IF (CTM_clock_current_LST%hr .LE. (23.-time_zone)) THEN
local_solar_time=CTM_clock_current_LST%hr + time_zone
ELSE
local_solar_time=CTM_clock_current_LST%hr - (time_zone + 1)
END IF
25
yday = real(CTM_clock_current_LST%jd)

!
30 !Initialise flux area
PollenFluxes(:, :)%Poln_1=0.0
Pfx(:, :)=0.0

! Apply normal distribution with integrated total = 464 kg/hectare as per Smart et al 1979

```



! depends on julian day, and season being oct 1st (jd 273, day 1) to dec 31st (day 92)

! ignore leap year. From C:\Thunderstorm Asthma\Unit tracer results\equation of normal distribution

kday=CTM\_clock\_current\_LST%jd - 273 ! this becomes x

5 pollen\_EF=exp(-0.5\*(((kday-46.5)/26.702)\*\*2))\*9.53E-8 ! adjusted for 464 kg hec-1

! define parameters for the pollen emissions functions (logistic representation)

! relative humidity

10 rh\_x1 = 0.5

rh\_x2 = 0.8

rh\_c = (rh\_x1 + rh\_x2)/2.0

rh\_alpha = 2 \* log((1 - logit\_y1)/logit\_y1)/(rh\_x2 - rh\_x1)

15 prc\_x1 = 0.0

! precipitation -

prc\_x2 = 0.5 ! originally in units of cm

prc\_c = (prc\_x1 + prc\_x2)/2.0

prc\_alpha = 2 \* log((1 - logit\_y1)/logit\_y1)/(prc\_x2 - prc\_x1)

20 prc\_logit0 = logistic(0.0, prc\_c, -prc\_alpha)

precip\_sum\_target = 40.0 ! de Morton et al., Int J Biometeorol (2011) 55:613-622, fig 4

loc\_solar\_mu = 12.0 ! Smart & Knox, Aust. J. Bot. 1979, 27, 317-331, figure 6 KME - bimodal?

loc\_solar\_sigma1 = 2.0 ! Smart & Knox, Aust. J. Bot. 1979, 27, 317-331, figure 6

25 loc\_solar\_sigma2 = 4.0

! this is normalised to take value 1.0 when loc\_solar\_time == loc\_solar\_mu

hour\_factor1 = gaussian\_pdf(local\_solar\_time, loc\_solar\_mu, loc\_solar\_sigma1) \* (loc\_solar\_sigma1 \* sqrt\_two\_pi)

hour\_factor2 = gaussian\_pdf(local\_solar\_time, loc\_solar\_mu, loc\_solar\_sigma2) \* (loc\_solar\_sigma2 \* sqrt\_two\_pi)

30

doy\_mu = 319.0 ! de Morton et al., Int J Biometeorol (2011) 55:613-622, fig 1 - KME: SAYS NOV 30th = 334

doy\_sigma = 18.0 ! de Morton et al., Int J Biometeorol (2011) 55:613-622, fig 1

soy\_mu = doy\_mu \*24.0\*60.0\*60.0 ! convert from day-of-year to second-of-year

soy\_sigma = doy\_sigma\*24.0\*60.0\*60.0 ! convert from day-of-year to second-of-year

```

first = .true.
Pfx(i,j)=0.
5 ! fill pointer area in Srate with PollenFlux
DO k=1,number_pollen_sizes

! fill PollenFlux array
DO j=1,ny
10 DO i=1,nx

oneD=i+(j-1)*nx !nxny

relhum = calc_rel_humid(sfctemp(i,j), sfcpres(i,j), mix_ratio(i,j,1) )
15 relhum_24h = calc_rel_humid(tscr_24h(i,j), sfcpres(i,j), SH_24h(i,j) )

prc = prcpR(i,j) + prcpU(i,j) * 3.6e6 !m/s ->mm/hr *1000*3600

! emissions decrease with relative humidity (hence negative rh_alpha)
20 rh_factor = f_stagnant + f_promote * logistic(relhum, rh_c, -rh_alpha) ! moderated
! rh_factor = logistic(relhum, rh_c, -rh_alpha)

! emissions decrease with precipitation (hence negative prc_alpha), also normalise so that no penalty is applied for zero
rainfall
25 prc_factor = f_stagnant + f_promote * logistic(prc,prc_c, -prc_alpha)/prc_logit0 ! moderated
! prc_factor = logistic(prc, prc_c, -prc_alpha)/prc_logit0

! temperature factor (follows the wind speed factor)
t2_factor = f_stagnant + f_promote * logistic(sfctemp(i,j) - KtoC, T_mid, T_rate)
30

! following equation 11 in Sofiev, 2013
f_wind = f_stagnant + f_promote * (1 - exp(-(wspd(i,j))/usatur))

SELECT CASE (pollen_emissions_parameterisation)

```

case (1)

immediate\_timing = wspd(i,j)

gross\_timing = pollen\_EF

spatial = pollen\_veg(i,j)

5 Pfx(i,j) = immediate\_timing \* gross\_timing \* spatial

case (2)

immediate\_timing = wspd(i,j)

gross\_timing = evi\_gradient(i,j)

spatial = pollen\_veg(i,j)

10 Pfx(i,j) = immediate\_timing \* gross\_timing \* spatial

case (3)

immediate\_timing = wspd(i,j)

gross\_timing = evi\_gradient(i,j)

spatial = 1.0 ! embodied in evi\_gradient

15 Pfx(i,j) = immediate\_timing \* gross\_timing \* spatial

case (4)

immediate\_timing = hour\_factor1 \* rh\_factor \* prc\_factor \* f\_wind \* t2\_factor

gross\_timing = evi\_gradient(i,j)

spatial = pollen\_veg(i,j)

20 Pfx(i,j) = immediate\_timing \* gross\_timing \* spatial

case (5)

immediate\_timing = hour\_factor1 \* rh\_factor \* prc\_factor \* f\_wind \* t2\_factor

gross\_timing = pollen\_EF

spatial = pollen\_veg(i,j)

25 Pfx(i,j) = immediate\_timing \* gross\_timing \* spatial

case (6)

immediate\_timing = hour\_factor2 \* rh\_factor \* prc\_factor \* f\_wind \* t2\_factor

gross\_timing = pollen\_EF

spatial = pollen\_veg(i,j)

30 Pfx(i,j) = immediate\_timing \* gross\_timing \* spatial

case (7)

! Production-loss model.

!

```

! emis = available * immediate_timing
! available = last_available + production - loss
! loss = L(last_available, rain, humidity)
! production = capacity * gross_timing
5 ! capacity = f'(landuse, prec_sum)
! gross_timing = g(temp_sum, lat)
! immediate_timing = h(wind, humidity, time_of_day)
!
gross_timing = pollen_EF
10 immediate_timing = hour_factor2 * rh_factor * prc_factor * f_wind * t2_factor
! prc has units mm/hr
loss_factor = calculate_loss_factor(prc , dtstep)
capacity_limit = max_capacity
prod = capacity_limit * pollen_veg(i,j) * gross_timing * dtstep
15 loss = last_available( i,j ) * loss_factor
available = last_available( i,j ) + prod - loss
released = available * immediate_timing
Pfx( i,j ) = released

! Note: we don't subtract the loss term ...
20 last_available(i,j) = available - released ! .. because it's equivalent to: last_available(i,j) = last_available(i,j) + prod -
loss - released

case (8)
!shifted Gaussian shapes depending on lon,lat
25 immediate_timing = hour_factor2 * rh_factor * prc_factor * f_wind * t2_factor

IF (geoGrid(i,j)%lat .GT. -37.0) THEN
pollen_EF = exp(-0.5*(((kday-34.65)/15.45)**2))*9.53E-8 ! Bendigo and Dookie

30 ELSEIF (geoGrid(i,j)%lat .LE. -37.0 .AND. geoGrid(i,j)%lon .GT. 143.5) THEN
pollen_EF = exp(-0.5*(((kday-50.5)/19.3)**2))*1.2E-7 ! Creswick and Churchill

ELSE
pollen_EF = exp(-0.5*(((kday-48.1)/7.7)**2))*1.56E-7 ! Hamilton

```

ENDIF

gross\_timing = pollen\_EF

spatial = pollen\_veg(i,j)

5 Pfx(i,j) = immediate\_timing \* gross\_timing \* spatial

case (9)

prcpThisDay(i,j) = prc \*24. ! should be the past 24-hours rainfall [mm]

prcpPreviousDay(i,j) = prc \*24. ! should be the previous 24 hours of rainfall [mm]

10

Pfx( i,j ) = emitAlaStatisticalModel\_v1(EVIfallDaySmoothed(i,j,1), EVIwinterMaxSmoothed(i,j,1),  
prcpThisDay(i,j), prcpPreviousDay(i,j), sfctemp(i,j) - KtoC, relhum \* 100., U10m(i,j), V10m(i,j), yday)

case (10)

15 prcpThisDay(i,j) = prc\*24. ! should be the past 24-hours rainfall [mm]

prcpPreviousDay(i,j) = prc\*24. ! should be the previous 24 hours of rainfall [mm]

Pfx( i,j ) = emitAlaStatisticalModel\_v2(EVIfallDaySmoothed(i,j,1), EVIwinterMaxSmoothed(i,j,1),  
prcpThisDay(i,j), prcpPreviousDay(i,j), sfctemp(i,j) - KtoC, relhum \* 100., U10m(i,j), V10m(i,j), yday,)

20

case default

Pfx( i,j ) = 0.0

end SELECT

25 Srate(oneD,pPN(k))=Srate(oneD,pPN(k))+Pfx(i,j)

!This allows more than one size fraction within poln\_1.

! also change the units here from g/m3/s to g/cell area/s while in nxny loop

PollenFluxes(oneD,k)%poln\_1 = Pfx(i,j)/zfull(i,j,1)\*dxy(i,j)

30

END DO !ny

END DO !nx

END DO !pollen size pointer

END SUBROUTINE CTM\_pollen\_emissions

MODULE CTM\_pollen\_auxiliary\_routines

5

contains

!-----

! calculate relative humidity based on water vapour mixing ratio, temperature & pressure

!-----

10 real function calc\_rel\_humid(ta, prs, qv)

implicit none

! real :: calc\_rel\_humid ! relative humidity, OUTPUT, units = fraction (0-1)

real, intent(in) :: ta ! air temperature, INPUT, units = K

real, intent(in) :: prs ! pressure, INPUT, units = PA

15 real, intent(in) :: qv ! water vapor mixing ratio, INPUT, units = kg/kg

! constants

real, parameter :: vp0 = 611.29 ! vapor press of water at 0 C [ Pa ]

real, parameter :: svpt0 = 273.15 ! constant for saturation vapor pressure [K]

real, parameter :: mvoma = 0.622 ! ratio of mol. weight of water vapor to mol weight of air [dimensionless]

20 ! local variables

real :: e\_sat ! sat vap pres (Pa) as fn of T (deg K)

real :: tempc ! air temperature, units = C

real :: qsat ! sat water vapor mixing ratio, units = kg/kg

real :: h2ovp ! ambient water vapor pressure [ Pa ]

25

tempc = ta-svpt0

e\_sat = vp0 \* exp( 17.625 \* tempc / ( 243.04 + tempc ) )

! qsat = e\_sat \* mvoma / ( prs - e\_sat )

! rh = qv / qsat

30 h2ovp = prs \* qv / ( mvoma + qv )

calc\_rel\_humid = MAX( 0.005, MIN( 0.99, h2ovp / e\_sat ) )

return

end function calc\_rel\_humid

```
!-----  
!   Logistic function (a smooth approximation to a piecewise-linear ramp between 0 and 1)  
!-----
```

```
5  function logistic(x, c, alpha) result(y)  
    implicit none  
    real, intent(in) :: x    ! abscissa of the logistic function  
    real, intent(in) :: c    ! midpoint (abscissa when ordinate = 0.5)  
    real, intent(in) :: alpha ! rate of increase (dydx(x=c) = 0.25 alpha)  
10  real          :: y    ! ordinate
```

```
    y = 1.0/(1.0 + exp(-alpha*(x-c)))
```

```
    return
```

```
15  end function logistic
```

```
!-----  
!   A smooth function that approximates  $y = \min(x, 1.0)$   
!-----
```

```
20  function smooth_ramp(x) result(y)  
    implicit none  
    ! arguments  
    real, intent(in) :: x  
    real          :: y  
25  ! local parameters  
    real, parameter :: alpha = 10.0 ! smoothness parameter. Increasing alpha means a sharper transition from  $y=x$  to  $y=1.0$   
    real, parameter :: c    = 0.999995459903963 ! intercept,  $c = \log(\exp(\alpha) - 1)/\alpha$ , so that  $\text{smooth\_ramp}(0.0) = 0.0$ 
```

```
    y = 1 - (1/alpha)*log(1 + exp(alpha*(c - x)))
```

```
30
```

```
! relationship between alpha and c
```

```
!    $0 = 1 - (1/\alpha)*\log(1 + \exp(\alpha*c))$ 
```

```
!    $1 = (1/\alpha)*\log(1 + \exp(\alpha*c))$ 
```

```
!    $\alpha = \log(1 + \exp(\alpha*c))$ 
```

```

!   exp(alpha) = 1 + exp(alpha*c)
!   exp(alpha*c) = exp(alpha) - 1
!   alpha*c = log(exp(alpha) - 1)
!   c = log(exp(alpha) - 1)/alpha
5   return
end function smooth_ramp

!-----
!   The Gaussian probability density function
10 !-----
function gaussian_pdf(x, mu, sigma) result(fx)
  implicit none
  real, intent(in) :: x    ! the abscissa of the Gaussian distribution PDF
  real, intent(in) :: mu   ! the mean of the Gaussian distribution
15  real, intent(in) :: sigma ! the standard deviation of the Gaussian distribution
  real              :: fx  ! the ordinate of the Gaussian distribution PDF

  ! parameters
  real, parameter :: sqrt_two_pi = 2.506628274631

20  fx = exp( -0.5 * (((x-mu)/sigma)**2)) / (sigma * sqrt_two_pi)

  return
end function gaussian_pdf

25 !-----
! Calculate the loss rate based on exponential decay, accelerated by rainfall
!-----
function calculate_loss_factor(rain, timestep) result(loss_factor)
30  implicit none
  real              :: loss_factor ! output: fraction of pollen available lost from plant to wet and dry deposition [0, 1]
  real, intent(in) :: rain        ! rain per hour [cm]
  real, intent(in) :: timestep    ! length of timestep [s]

```



```

real, parameter :: half_life_dry = 2.0 ! pollen assumed to have a half-life of 2 days on the plant in dry conditions
real, parameter :: half_life_rain = 0.5 ! pollen assumed to have a half-life of 0.5 days on the plant in rainy conditions
real, parameter :: rain_thresh = 0.2 ! threshold rain rate per hour above which the pollen half-life is set to half_life_rain [cm]
real, parameter :: ln2 = 0.693147180559945

5
real :: half_life
real :: rain_factor
real :: lambda ! decay rate
real :: dt

10 real, parameter :: seconds_per_day = 86400.0

rain_factor = min(rain/rain_thresh,1.0)
half_life = rain_factor*half_life_rain + (1.0-rain_factor)*half_life_dry
lambda = ln2/half_life

15 dt = timestep/seconds_per_day
loss_factor = dt*lambda
! rain = 0.0      => rain_factor = 0.0 => half_life = half_life_dry
! rain = rain_thresh => rain_factor = 1.0 => half_life = half_life_rain
! rain = 0.5*rain_thresh => rain_factor = 0.5 => half_life = 0.5*(half_life_rain + half_life_dry)

20
return
end function calculate_loss_factor

!-----
25 ! Estimate the seasonal pollen capacity based on the rainfall
!-----

function capacity_factor(precip_sum, max_capacity, precip_sum_target) result(capacity)
implicit none
real, intent(in) :: precip_sum
30 real, intent(in) :: max_capacity
real, intent(in) :: precip_sum_target
real      :: capacity

capacity = max_capacity * smooth_ramp(precip_sum/precip_sum_target)

```

```

return
end function capacity_factor

5  ! probability density function of the Cauchy distribution
function dcauchy(x, x0, gamma) result (y)
  implicit none
  ! arguments
  real, intent(in) :: x ! x-value at which to calculate the
10  real, intent(in) :: x0 ! location parameter for the distribution
  real, intent(in) :: gamma ! spread parameter for the distribution
  real :: y ! the resulting PDF value
  ! local variables
  real, parameter :: pi = 3.14159265358979

15  y = ( 1.0 / (pi * gamma)) * (gamma**2 / ((x - x0)**2 + gamma**2))

  return
end function dcauchy

20  ! copied from numerical recipes in F77 (SUBROUTINE LOCATE)
subroutine find_interval(n,xvals,xtest,idx)
  implicit none
  ! arguments
25  integer, intent(in) :: n
  real, intent(in) :: xvals(n), xtest
  integer, intent(out) :: idx
  ! local variables
  integer :: ilow, imid, iup

30  ilow = 0
  iup = n+1
10  if(iup-ilow .gt. 1)then ! If we are not yet done,
    imid=(iup+ilow)/2 ! compute a midpoint,

```

```

    if((xvals(n) .ge. xvals(1)) .eqv. (xtest .ge. xvals(imid))) then
        ilow = imid ! and replace either the lower limit
    else
        iup = imid ! or the upper limit, as appropriate.
5    endif
    goto 10 ! Repeat until
endif ! test condition 10 is satisfied.

if(xtest .eq. xvals(1)) then ! Then set the output
10    idx = 1
    else if(xtest.eq.xvals(n))then
        idx = n-1
    else
        idx = ilow
15    endif
    return
end subroutine find_interval

function emitAlaStatisticalModel_v1(EVIfallDaySmoothed, EVIwinterMaxSmoothed, &
20    prcpThisDay, prcpPreviousDay, TM, RH, U10m, V10m, yday,) result(emis)
    implicit none
    ! arguments
    real, intent(in) :: EVIfallDaySmoothed
    real, intent(in) :: EVIwinterMaxSmoothed
25    real, intent(in) :: prcpThisDay
    real, intent(in) :: prcpPreviousDay
    real, intent(in) :: TM
    real, intent(in) :: RH
    real, intent(in) :: U10m, V10m
30    real, intent(in) :: yday
    real :: emis

    ! local variables
    real :: a0

```

```

real :: b0
real :: mu

real :: a1
5 real :: b1
real :: sf

real :: lnsmooth
real :: l1pRN, l1pRNm1upwind

10 real :: WD, wd2
real :: f5x5, f6x6
integer :: idx
real :: lnFC

15 real :: TMtest, RHtest
real, parameter :: sigma = 19.
real :: ydayTest(3)
integer :: iMinYdayTest
real :: ydayToUse

20

! regression coefficients from the EVI fall day to pollen peak day
! MU = (a0 + b0 * EVIfallDaySmoothed(ix,iy)) %% 365
!! based on unsmoothed data:
25 ! a0 = 246.679166
! b0 = 0.251085
!! based on smoothed data:
a0 = 0.0
b0 = 1.0

30 mu = mod(a0 + b0 * EVIfallDaySmoothed, 365.0)
! regression coefficients from the EVI winter max to the pollen season magnitude
! SF = pmax(a1 + b1 * EVIwinterMaxSmoothed(ix,iy),0)
!! based on smoothed data:
a1 = -4355.913

```

```

b1 = 21490.343
sf = max(a1 + b1 * EVIwinterMaxSmoothed,0.0)

! The following chunk of code determines whether the centre of
5 ! the phenology curve is closest to the day-of-year yday-365,
! yday or yday+365. The ydayToUse is then the value among
! yday-365, yday or yday+365 that is closest to day-of-year 'mu'
! (the centre of the distribution).
ydayTest = (/ abs(yday - 365 - mu), abs(yday - mu), abs(yday + 365 - mu) /)
10 iMinYdayTest = minloc(ydayTest,1)
ydayToUse = yday + 365.*real(iMinYdayTest - 2)

lnsmooth = log(dcauchy(ydayToUse,mu,sigma)*sf)

15 ! prcpThisDay should be in units of mm
l1pRN = log(1.0+prcpThisDay)

! prcpPreviousDay should be in units of mm
l1pRNm1upwind = log(1.0+prcpPreviousDay)
20

TMtest = max(min(TM, TM_x(nTMpoints)), TM_x(1))
call find_interval(nTMpoints, TM_x, TMtest, idx)
f5x5 = TM_y(idx)

25 RHtest = max(min(RH, RH_x(nRHpoints)), RH_x(1))
call find_interval(nRHpoints, RH_x, RHtest, idx)
f6x6 = RH_y(idx)

30 lnFC = -0.290379277 + 0.970041571 * lnsmooth - 0.182604732 * l1pRNm1upwind + &
& -0.117335246 * l1pRN + f5x5 + f6x6
emis = exp(lnFC)-1.0

return
end function emitAlaStatisticalModel_v1

```

```

function emitAlaStatisticalModel_v2(EVIfallDaySmoothed, EVIwinterMaxSmoothed, &
  prcpThisDay, prcpPreviousDay, TM, RH, U10m, V10m, yday) result(emis)
implicit none
5  ! arguments
  real, intent(in) :: EVIfallDaySmoothed
  real, intent(in) :: EVIwinterMaxSmoothed
  real, intent(in) :: prcpThisDay
  real, intent(in) :: prcpPreviousDay
10  real, intent(in) :: TM
  real, intent(in) :: RH
  real, intent(in) :: U10m, V10m
  real, intent(in) :: yday
  real :: emis
15
  ! local variables
  real :: a0
  real :: b0
  real :: mu
20
  real :: a1
  real :: b1
  real :: sf
25
  real :: lnsmooth
  real :: l1pRN,

  real :: WD, wd2
  integer :: idx
30
  real :: lnFC
  real :: TMtest, RHtest
  real, parameter :: sigma = 19.
  real :: ydayTest(3)
  integer :: iMinYdayTest

```

```

real :: ydayToUse

real :: RH2test, sRH2val
real :: TM4test, sTM4val
5  real :: RNtest, sRNval

real :: WS3

10  ! regression coefficients from the EVI fall day to pollen peak day
! MU = (a0 + b0 * EVIfallDaySmoothed(ix,iy)) %% 365
!! based on smoothed data:
a0 = 181. + 21.477641
b0 = 0.384697
15  mu = mod(a0 + b0 * EVIfallDaySmoothed, 365.0)
! regression coefficients from the EVI winter max to the pollen season magnitude
! SF = pmax(a1 + b1 * EVIwinterMaxSmoothed(ix,iy),0)
!! based on smoothed data:
a1 = 267.6271
20  b1 = 8853.9903
sf = min(max(a1 + b1 * EVIwinterMaxSmoothed, 0.0), 1.5*6894.355)

! The following chunk of code determines whether the centre of
! the phenology curve is closest to the day-of-year yday-365,
25  ! yday or yday+365. The ydayToUse is then the value among
! yday-365, yday or yday+365 that is closest to day-of-year 'mu'
! (the centre of the distribution).
ydayTest = (/ abs(yday - 365 - mu), abs(yday - mu), abs(yday + 365 - mu) /)
iMinYdayTest = minloc(ydayTest,1)
30  ydayToUse = yday + 365.*real(iMinYdayTest - 2)

lnsmooth = log(dcauchy(ydayToUse,mu,sigma)*sf)

WS3 = sqrt(U10m**2 + V10m**2)

```

```
RH2test = max(min(RH, RH2_x(nRH2points)), RH2_x(1))
call find_interval(nRH2points,RH2_x,RH2test,idx)
sRH2val = RH2_y(idx)
5
TM4test = max(min(TM, TM4_x(nTM4points)), TM4_x(1))
call find_interval(nTM4points,TM4_x,TM4test,idx)
sTM4val = TM4_y(idx)
10
RNtest = max(min(prcpThisDay, RN_x(nRNpoints)), RN_x(1))
call find_interval(nRNpoints,RN_x,RNtest,idx)
sRNval = RN_y(idx)

lnFC = 1.225480027 + 0.769707046 * lnsmooth - 0.032793100 * WS3 + sRH2val + sTM4val + sRNval
15
emis = exp(lnFC)-1.0

return
end function emitAlaStatisticalModel_v2
20
END MODULE CTM_pollen_auxiliary_routines
```
